# Supplementary material
Source: PubMed Central journal article supplement (PMC4004657)
Supplement: NIHMS568022-supplement-Supplement.pdf [file NIHMS568022-supplement-Supplement.pdf]

## **Supplemental materials**

Note

### **Role of CYP3A in isoniazid metabolism in vivo**

Ke Liu<sup>1</sup>, Feng Li<sup>2</sup>, Jie Lu<sup>1</sup>, Zhiwei Gao<sup>3</sup>, Curtis D Klaassen<sup>2</sup>, Xiaochao Ma<sup>1,\*</sup>

**Supplemental table 1. Pharmacokinetic parameters of INH and AcINH.** WT and *Cyp3a*-null mice were treated with 50 mg/kg INH. Blood samples were collected after INH treatment and analyzed by UPLC-QTOFMS. Pharmacokinetic parameters were generated by WinNonlin. Data are expressed as mean  $\pm$  S.D., n=4.

|                                                                         | INH              |                    | AcINH          |                    |
|-------------------------------------------------------------------------|------------------|--------------------|----------------|--------------------|
|                                                                         | WT               | <i>Cyp3a</i> -null | WT             | <i>Cyp3a</i> -null |
| <b>T<sub>max</sub> (h)</b>                                              | 0.2 $\pm$ 0.2    | 0.2 $\pm$ 0.1      | 0.9 $\pm$ 0.3  | 1.0 $\pm$ 0.0      |
| <b>C<sub>max</sub> (<math>\mu</math>g/ml)</b>                           | 63.0 $\pm$ 6.8   | 70.6 $\pm$ 6.5     | 4.4 $\pm$ 0.1  | 4.4 $\pm$ 0.5      |
| <b>AUC<sub>0-8h</sub><br/>(h<math>\cdot</math><math>\mu</math>g/ml)</b> | 94.1 $\pm$ 6.1   | 84.6 $\pm$ 8.6     | 15.0 $\pm$ 1.1 | 14.5 $\pm$ 0.7     |
| <b>T<sub>1/2</sub> (h)</b>                                              | 1.0 $\pm$ 0.2    | 1.2 $\pm$ 0.2      | 2.8 $\pm$ 0.9  | 3.2 $\pm$ 0.6      |
| <b>CL (ml/h/kg)</b>                                                     | 533.0 $\pm$ 35.0 | 596.0 $\pm$ 65.0   | –              | –                  |

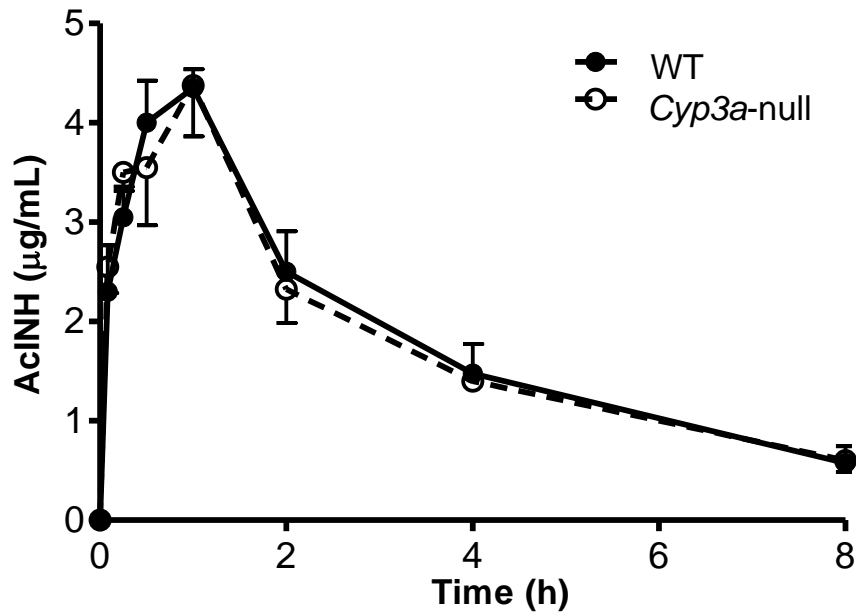

**Supplemental figure 1. Serum concentration-time curve of AcINH.** WT and *Cyp3a*-null mice were treated with a single oral dose of 50 mg/kg INH. Blood samples were obtained at 0.083, 0.25, 0.5, 1, 2, 4, and 8 h after administration. AcINH was analyzed by UPLC-QTOFMS. Data are expressed as means  $\pm$  S.D., n = 4 at each time point.

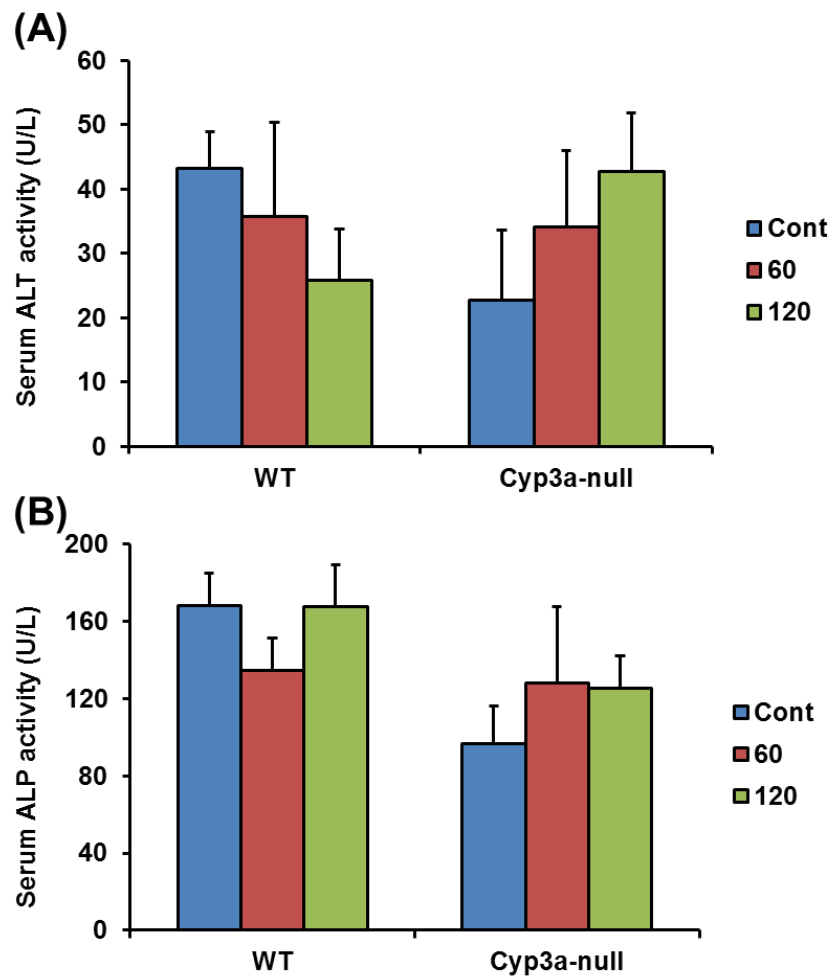

**Supplemental figure 2. Serum ALT (A) and ALP (B) activities.** WT and *Cyp3a*-null mice were treated orally with 60 or 120 mg/kg INH. Blood samples were obtained at 18 h after administration. The data are expressed as means  $\pm$  S.D., n = 3 or 4.
